# Supplementary material
Source: PubMed Central journal article supplement (PMC3528572)
Supplement: 1203035109_pnas.201203035SI.pdf [file 1203035109_pnas.201203035SI.pdf]

# Supporting Information

Tu et al. 10.1073/pnas.1203035109

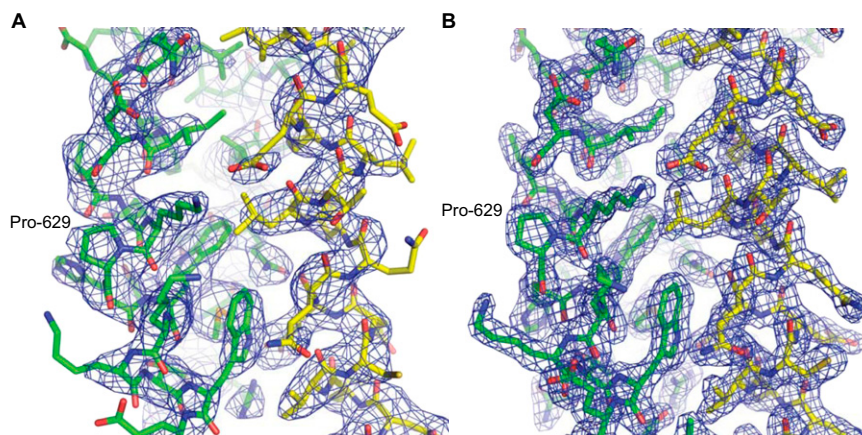

**Fig. S1.** Electron density maps of Bud6 core. (A) Solvent flattened experimental map at 2.9 Å, contoured at  $1\sigma$ . The dimer interface around the proline residue, Pro-629, is illustrated. Two chains are shown in different colors. (B)  $\sigma_A$ -weighted  $2F_o - F_c$  map at 2.04 Å, contoured at  $1.3\sigma$ . The viewing angle is the same as in A.

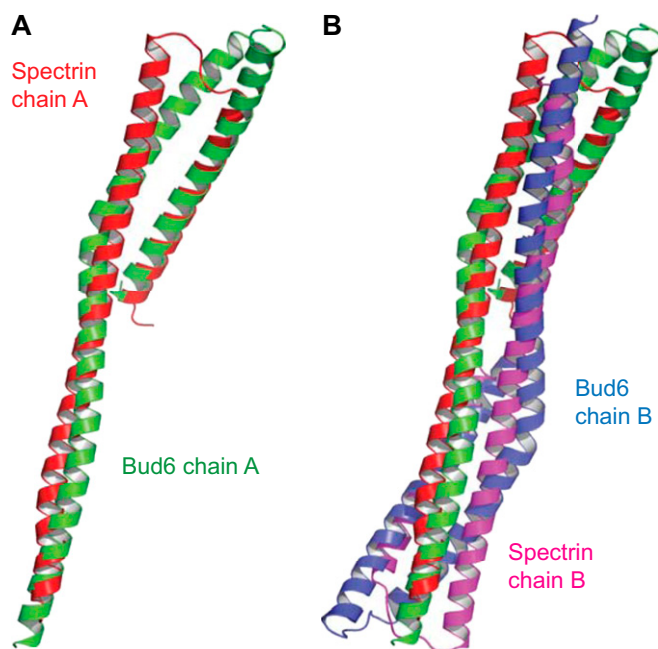

**Fig. S2.** Superposition of Bud6 core with a domain-swapped form of spectrin repeat using the overlay matrix determined by distance matrix alignment (DALI). (A) One chain of Bud6 (residues 553–672, colored green) superimposes with the 14th segment of *Drosophila*  $\alpha$ -spectrin (Protein Data Bank ID code 2SPC; chain A, colored red) with an rmsd deviation of 3.1 Å for 96 aligned C $\alpha$  atoms and a Z-score of 7.1. (B) Entire Bud6 core dimer is shown together with the spectrin dimer, which is not thought to be physiological.

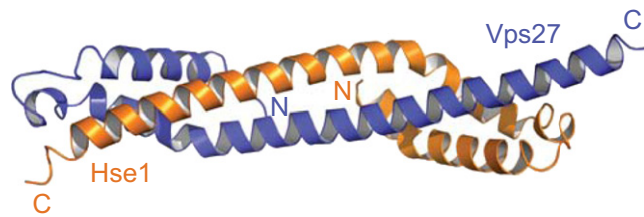

**Fig. S3.** Crystal structure of a Vps27/Hse1 complex (Protein Data Bank ID code 2PJW) has a topology resembling that of the Bud6 core dimer.

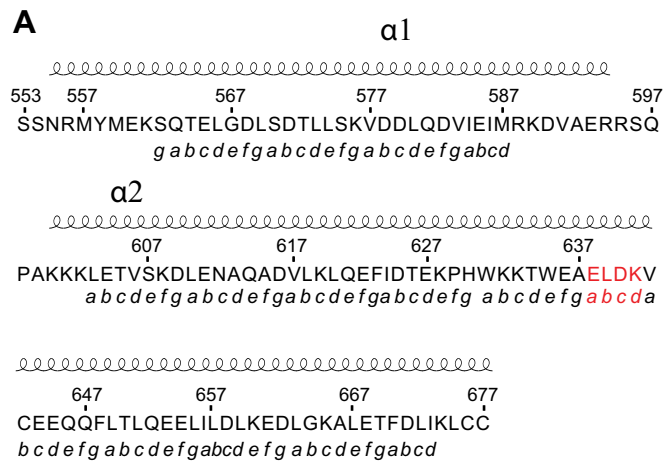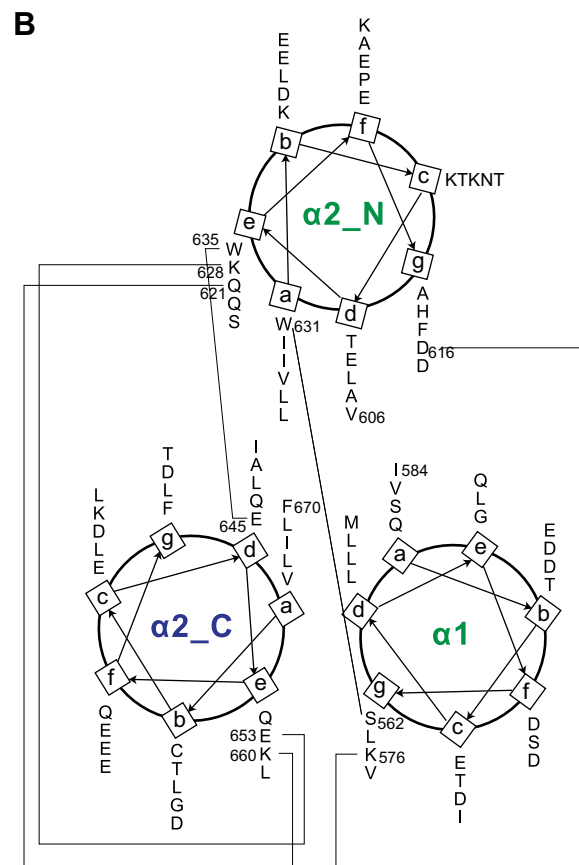

**Fig. S4.** Coiled-coil interface of Bud6<sup>core</sup>. (A) Heptad register according to the knobs-into-holes criterion is displayed below the primary sequence. The secondary structure is on top. We noted a change in the phasing of the heptad pattern of helix  $\alpha 2$ , where the structure changes momentarily from a three-helix to two-helix coiled-coil and then reenters the three-helix coiled-coil. This type of discontinuity has been classified as a stutter (1), in which a heptad repeat is shortened to four residues, leaving only residues *a–d*. This stutter in Bud6<sup>core</sup> is colored red. (B) Helical wheel diagram of the three-helix coiled-coil.  $\alpha 2_N$  stands for the N-terminal portion of helix  $\alpha 2$  before it enters the stutter.  $\alpha 2_C$  stands for the C-terminal portion of helix  $\alpha 2$  after the stutter. Note that the green  $\alpha 1$  and  $\alpha 2_N$  are from one subunit and the blue  $\alpha 2_C$  is from the other subunit. From the N terminus to the C terminus, helix  $\alpha 1$  is coming out of the page toward the reader, whereas helix  $\alpha 2_N$  is going into the page. Helix  $\alpha 2_C$  is also coming out of the page toward the reader. Selected residues are numbered, and polar interactions are indicated by connecting lines.

1. Brown JH, Cohen C, Parry DA (1996) Heptad breaks in alpha-helical coiled coils: stutters and stammers. *Proteins* 26(2):134–145.



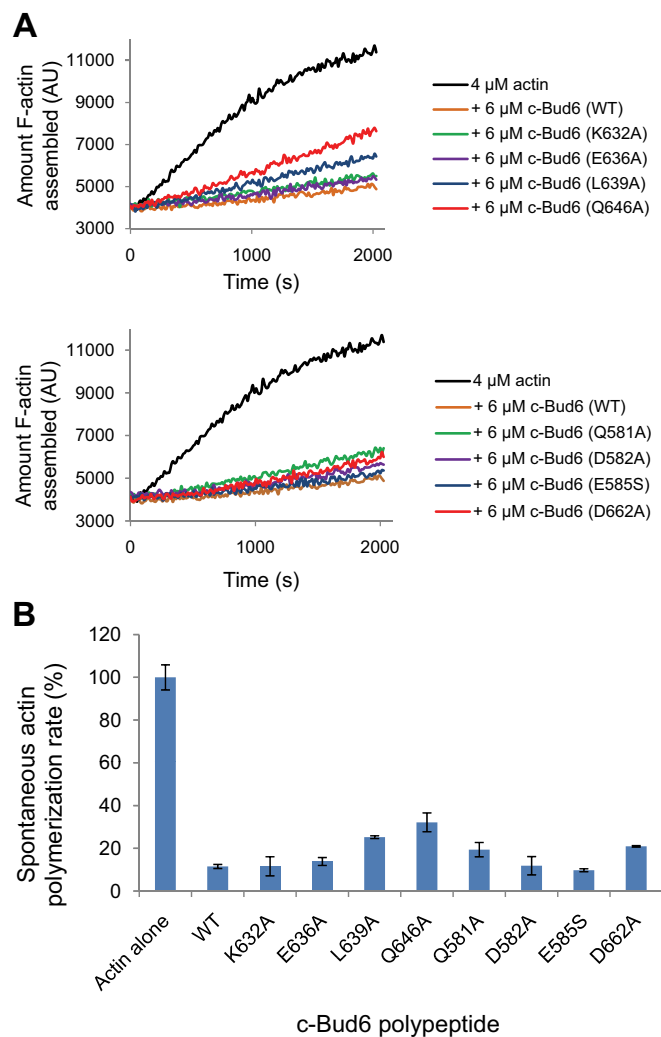

**Fig. S6.** Direct binding of C-terminal fragment of Bud6 (c-Bud6) polypeptides to monomeric actin via suppression of spontaneous nucleation. (A) Monomeric actin (4  $\mu$ M, 2.5% pyrene-labeled) was polymerized alone or in the presence of the indicated c-Bud6 polypeptide (6  $\mu$ M). (B) Quantification of reactions in A. The rate of spontaneous polymerization in reactions containing actin alone was normalized to 100%. Rates of reactions containing the indicated c-Bud6 polypeptides were scaled relative to reactions containing actin alone. Each bar represents an average of at least two trials. AU, arbitrary units; These are the raw fluorescence readings.

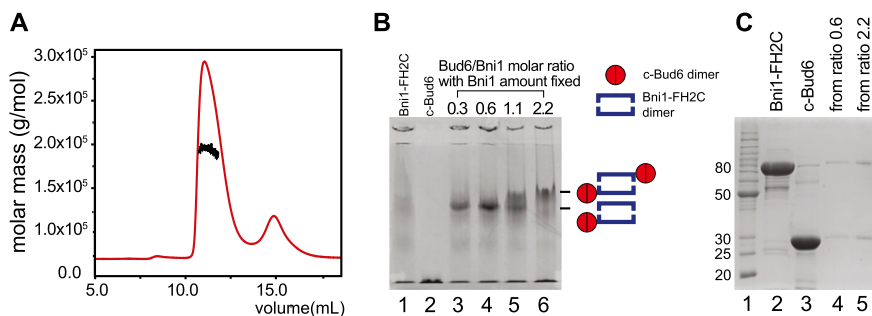

**Fig. S7.** Stoichiometry of Bni1/Bud6 complexes. (A) Analysis of the Bud6<sup>core</sup>/Bni1-formin homology-2 (FH2C) complex by size exclusion chromatography (SEC) multiangle light scattering (MALS) revealed a molar mass of  $\sim$ 196 kDa, consistent with a 2:1 complex of Bud6<sup>core</sup> and the Bni1 construct encompassing its FH2 domain and C-terminal tail region (Bni1-FH2C) dimer, which has an expected molar mass of 208 kDa. (B) Native-PAGE analysis of C-terminal fragment of Bud6 (c-Bud6) and Bni1-FH2C. The Bni1-FH2C protein alone (lane 1) or with increasing molar ratios of c-Bud6 as indicated (lanes 3–6) was resolved on a 7.5% native gel. Bni1 alone does not form a well-defined band (lane 1), and c-Bud6 alone migrates at the dye front (lane 2), but the complex forms clear bands that migrate in the center of the gel (lanes 3–6). Two species are apparent: a faster migrating (Lower) band seen with substoichiometric amounts of Bud6 and a more slowly migrating (Upper) band that predominates at a 2.2:1 molar ratio of c-Bud6 to Bni1. As indicated by the schematic, this is the expected banding pattern for binding of one (Lower) or two (Upper) c-Bud6 dimers to noninteracting sites on the Bni1-FH2C dimer. (C) SDS/PAGE analysis of excised native-PAGE bands of the Bud6/Bni1 complex. The bands from Bud6/Bni1 molar ratios of 0.6 and 2.2 in B were excised and resolved on a 12% SDS/PAGE denaturing gel.

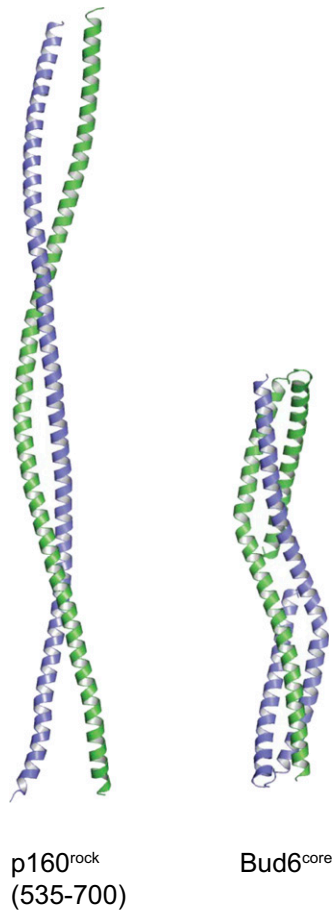

**Fig. S8.** Comparison of structures of p160<sup>rock</sup> (residues 535–700) and Bud6<sup>core</sup>. The structures are displayed at the same scale.

## Other Supporting Information Files

[Dataset S1 \(PDF\)](#)
