# Supplementary material
Source: PubMed Central journal article supplement (PMC3528572)
Supplement: 1203035109_sd01.pdf [file 1203035109_sd01.pdf]

### **Supporting Information Appendix**

This file contains the aligned sequences of the c-terminal region of Bud6 from 46 fungi, and is shaded according to evolutionary sequence variation as analyzed with the CONSURF server. Magenta corresponds to the most conserved residues, teal the most variable. Numbering corresponds to that of the input sequence (residues 550-788 of *S. cerevisiae* Bud6). Organism and additional identifying information for each of the aligned sequences is provided after the alignment. See Fig. 3A in the main text for mapping of sequence conservation onto the Bud6<sup>core</sup> structure and for further details.

### ConSurf Color-Coded MSA

5 5 0 5 9 9

Input protein seq

C0NMS1|C0NMS1\_AJECG\_813\_1054 - EGDAGRARVNA GKKE LADESERIVARVDDLQDLVEIDLKRDVVT RGV RPL

C5JIM8|C5JIM8\_AJEDS\_758\_999 - EGDAGRARVNA GKKE LADESERIVARVDDLQDLVEIDLKRDVVT RGV RPL

G8JM94|G8JM94\_ERECY\_505\_740 ASTSSNRVYMEQS QTKLSELS DILLAKVDDLQDLVEIDLKRDVAIRGAKPT

C4JTL0|C4JTL0\_UNCRE\_763\_1005 - EGDAGRARINAGKKE LADESEKLVARVDDLQDLVEIDLKRDVVT RGV RPL

A5DT78|A5DT78\_LODEL\_567\_805 SSQSSNRLYMES CQSKLSDESDKLLTKVDDLQDLMEEV RKDVAQRGV RVG

C0RYR4|C0RYR4\_PARBP\_747\_990 - EGDACRARVNA GKKE LADESEKIVARVDDLQDLVEIDLKRDVVT RGV RPL

B8LVI6|B8LVI6\_TALSN\_772\_1009 - EGDAGRARINS GKKE LSDESERLVGRVDDLQDLVEIDLKRDVVS RGV RPL

B2B176|B2B176\_PODAN\_778\_1024 - EGDSGRAYVINGR KQLNTDSDRLVNKVDDLQDLVEIDLKRDVVHRGV RPL

A7EXU2|A7EXU2\_SCLS1\_748\_984 --GDSGRSYVNGKKNLSESDKLVAVQVDDLQDLVEIDLKRDVVQRGV RPL

C5E095|C5E095\_ZYGR\_627\_861 -KSSSNRYIETSSQNR LSESDALLSKVDDLQDLVEIDLKRDVAHGV KPS

G0VKP2|G0VKP2\_NAUCC\_499\_733 -KTSANKVYMEKSSQAE LGEVSDSLSRVDDLQDLIEVLRKDVA DRGAEPS

G0S222|G0S222\_CHATD\_740\_981 -E GDSGRAYVMNGRKR LNADSDRLVNKVDDLQDAVEIDLKRDVVHRGV RPL

B0XQ86|B0XQ86\_ASPFC\_715\_953 -E G D A G R A R V N A G K K E L A D E S E R L V G R V D D L Q D L V E I D L R K D V V S R G V R P L

C5FGY5|C5FGY5\_ARTOC\_704\_937 - - - - - A R V Q A G K K E L A D E S E K L V A R V D D L Q D L V E I D L R K D V V T R G V R P L

A2QQ46|A2QQ46\_ASPNC\_595\_832 -E G D A G R V R V N S G K K E L A E E S E R L V A R V D D L Q D L V E I D L R K D V V T R G V R P L

Q5BDQ6|Q5BDQ6\_EMENI\_663\_900 -E G D A G R A R V N L G K K E L A E E S E R L V A R V D D L Q D L I E I D L R K D V V S R G V R P L

E4V6G7|E4V6G7\_ARYGC\_627\_861 - - - - - A R V Q A G K K E L A D E S E K L V A R V D D L Q D L V E I D L R K D V V T R G V R P L

G8ZTF7|G8ZTF7\_TORDC\_503\_737 -AASSNRAYMDKSSQS QLGEE SDALLSRVDDLQDLIEILR KDVAARGAKPS

A7TKA3|A7TKA3\_VANPO\_580\_812 --NSSDRSYMEKSSQTKLGDISDSLTRVDDLQDLIEVLRKDVA DRGVKPT

E5R4K3|E5R4K3\_LEPMJ\_701\_942 --GDSGRAYINAGKKT LQEDSEKIVNRVDDLQDLIEIDLKRDVVMRGV RPL

Q6CSS1|Q6CSS1\_KLULA\_463\_695 --KSANRDYMEKSSQSKLSEVSDNLLSKVDDLQDLIEALR KDVAIRGARTP

Q752S8|Q752S8\_ASHGO\_464\_702 AS T S A N R V Y M E Q S H S K L S E L S D S L L A K V D D L Q D I E A L R K D V A I R G A K P T

A1CQE8|A1CQE8\_ASPCL\_720\_958 -E G D A G R S R V N S G K K E L A D E S E R L V G R V D D L Q D L V E I D L R K D V V S R G V R P L

Q0USK3|Q0USK3\_PHANO\_614\_857 -GDTGRAYINTGKKS LQDDSEKIVNRVDDLQDLVEIDLKRDVVQRGV RPL

F8MP24|F8MP24\_NEUT8\_719\_970 -E G D S G R A Y V T K G R K L N A D S D W L V N K V D D L Q D L I E I D L R K D V V H R G V R P R

F9XNV1|F9XNV1\_MYCGM\_735\_976 --NNTGRAYVNNGKKS LSDDSESI VNRVDDLQDLVEIDLKRDVVT RGV RPL

G0WGY8|G0WGY8\_NAUDC\_529\_761 -KTSANRVYMDKSSQNE LGEVSDSLSRVDDLQDLIEVLRKDVA DRGAKPS

E9CRI9|E9CRI9\_COCPS\_229\_471 -E G D A G R A R V N A G K K E L A D E S E K L V A R V D D L Q D L V E I D L R K D V V T R G V R P L

G8BZF4|G8BZF4\_TETPH\_539\_773 -A G S S T R S Y I E K S Q S K L G V V S D N L L S K V D D I Q D I E V L R K D V A V R G V N P S

B6H938|B6H938\_PENCW\_630\_867 -E G D A G R A R V N T G K K E L A A E S E R L V A R V D D L Q D L V E I D L R K D V V T R G V R P L

B8N7C6|B8N7C6\_ASPFN\_422\_660 -E G D A G R A R V N S G K K E L G E E S E R L V A R V D D L Q D L V E I D L R K D V V T R G V R P L

G2QNC1|G2QNC1\_THIHA\_727\_972 -E G E S G H S Y V A N G R K K L N A D S D R L V N K V D D L Q D M V E I D L R K D V V H R G V R P L

G2RG25|G2RG25\_THITE\_710\_954 -E G D A G H S Y V I K G R K Q L N A D S D R L V N K V D D L Q D M V E I D L R K D V V H R G V R P L

Q2GNJ2|Q2GNJ2\_CHAGB\_640\_887 -E G N A G H A Y V I T G R K Q L N Q D S D R L V N R V D D L Q D L V E I D L R K D V V H R G V R P L

G2XAD1|G2XAD1\_VERDV\_678\_911 - - - - - Y V S K G R E Q L N Q D S D R L V T K V D D L Q D T V E I D L R K D V V H R G V R P L

E3RQ08|E3RQ08\_PYRTT\_696\_940 --GDSGRAYINTGKKA LQDDSEKIVNRVDDLQDLVEIDLKRDVVLRGV RPL

H6BXA5|H6BXA5\_EXODN\_750\_985 -KADAGRAHINESKVLSDSEALVNRVDDLS DIVEELR KDVVTRGV RPL

H2ANZ7|H2ANZ7\_KAZAF\_476\_713 S A T G S A K A Y M E K S Q S E I G Q V S D G L L S R V D D L Q D I E I L R K D V A E R G A R P S

E3QGD9|E3QGD9\_COLGM\_636\_870 - - - - - A Y V H K G R E Q L N A D S D R L V A K V D D L Q D L V E I D L R K D V V H R G V R P L

G4MPB7|G4MPB7\_MAGO7\_726\_967 - - - - - A Y V I K G R K Q L N T D S D R L V T Q V D D L Q D I V E I D L R K D V V T R G V R P R

C5MCQ6|C5MCQ6\_CANTT\_510\_747 -S Q N S N R A Y M E S C N S K L S D S D L L I T K V D D L Q D V M E E M R K D V A Q R G V R V S

G3B1Y0|G3B1Y0\_CANTC\_529\_767 A T K S S N R I Y M E K C H G R L S E E S D S L L T K V D D L Q D V M E G L R K D V A Q R G V R V G

G0RS34|G0RS34\_HYPJQ\_714\_954 -E G D A G Y A Y V S N G R K Q L N A D S D R L V A K V D D L Q D L V E I D L R K D V V H R G V R P L

G3ATL7|G3ATL7\_SPAPN\_430\_667 -S K D S N R S F M E T C H T K L S E E S D V L I T K V D D L Q D L V E I D L R K D V A Q R G V R I S

Q0CQ01|Q0CQ01\_ASPTN\_621\_856 -E G D A G R A R V N S G K K E L A E E S E R I V A R V D D L Q D L V E I D L R K D V V T R G V R P L

6 0 0 6 4 9

Input protein seq

C0NMS1|C0NMS1\_AJECG\_813\_1054 K K K L E T V S K D L E N A Q A D V L K L Q E F I D T E K P H W K K T W E A E L D K V C E E Q Q F L

C5JIM8|C5JIM8\_AJEDS\_758\_999 P R Q L E A V G R D I G A V S K E L N K M K E F L K R E K P I W T K I W E K E L Q L V C E E R D Q L

G8JM94|G8JM94\_ERECY\_505\_740 P R Q L E A V G R D I S A V T K E L K K M Q E F L K R E K P I W T K I W E K E L Q L V C E E R D Q L

C4JTL0|C4JTL0\_UNCRE\_763\_1005 R K K L D A V Q N E L K R A T E D L G K M E A Y I N I E K P N W K M I W E S E L D K V C E E Q Q F L

A5DT78|A5DT78\_LODEL\_567\_805 P R Q L E A V G R D I S A V T K E L K K M Q D F L R R E K P I W T K I W E K E L Q Q V C E E R D Q L

C0RYR4|C0RYR4\_PARBP\_747\_990 E K Q L K Y I V K E I Q D A N K T L Q M S T Y I T S E K S T W K K I W E S E L D K V C E E Q Q F F

B8LVI6|B8LVI6\_TALSN\_772\_1009 P R Q L E A V G R D I S A V S K E L K K M Q E F L K R E K P I W T K I W E K E L Q L V C E E R D Q L

B2B176|B2B176\_PODAN\_778\_1024 P R Q L E A V S K D I S T V T K E V K K M Q D F L K R E K P I W T K I W E K E L Q L V C E E R D Q L

A7EXU2|A7EXU2\_SCLS1\_748\_984 P R Q L E S V T K D I T Q L T K E L N K M E E Y M K Q E K P V W T K I W E K E L E D V C Q G R D E L

C5E095|C5E095\_ZYGR\_627\_861 P K Q L E T V A K D I S Q A T M E L K R M Q D F L K R E R P I W T K I W E K E L E T V C N D R E E I

K K K L D S V Q K E L V L A E N D L S M M Q M F M Q N E K P Q W K K I W K A E L E K V C E E Q Q F L

600

G0VKP2|G0VKP2\_NAUCC\_499\_733  
 G0S222|G0S222\_CHATD\_740\_981  
 B0XQ86|B0XQ86\_ASPFC\_715\_953  
 C5FGY5|C5FGY5\_ARTOC\_704\_937  
 A2QQ46|A2QQ46\_ASPNC\_595\_832  
 Q5BDQ6|Q5BDQ6\_EMENI\_663\_900  
 E4V6G7|E4V6G7\_ARTGP\_772\_1004  
 G8ZTF7|G8ZTF7\_TORDC\_503\_737  
 A7TKA3|A7TKA3\_VANPO\_580\_812  
 E5R4K3|E5R4K3\_LEPMJ\_701\_942  
 Q6CSS1|Q6CSS1\_KLULA\_463\_695  
 Q752S8|Q752S8\_ASHGO\_464\_702  
 A1CQE8|A1CQE8\_ASPCL\_720\_958  
 Q0USK3|Q0USK3\_PHANO\_614\_857  
 F8MP24|F8MP24\_NEUT8\_719\_970  
 F9XNV1|F9XNV1\_MYCGM\_735\_976  
 G0WGY8|G0WGY8\_NAUDC\_529\_761  
 E9CRI9|E9CRI9\_COCPS\_229\_471  
 G8BZF4|G8BZF4\_TETPH\_539\_773  
 B6H938|B6H938\_PENCF\_630\_867  
 B8N7C6|B8N7C6\_ASPFN\_422\_660  
 G2QNC1|G2QNC1\_THIHA\_727\_972  
 G2RG25|G2RG25\_THITE\_710\_954  
 Q2GNJ2|Q2GNJ2\_CHAGB\_640\_887  
 G2XAD1|G2XAD1\_VERDV\_678\_911  
 E3RQ08|E3RQ08\_PYRTT\_696\_940  
 H6BXA5|H6BXA5\_EXODN\_750\_985  
 H2ANZ7|H2ANZ7\_KAZAF\_476\_713  
 E3QGD9|E3QGD9\_COLGM\_636\_870  
 G4MPB7|G4MPB7\_MAGO7\_726\_967  
 C5MCQ6|C5MCQ6\_CANTT\_510\_747  
 G3B1Y0|G3B1Y0\_CANTC\_529\_767  
 G0RS34|G0RS34\_HYPJQ\_714\_954  
 G3ATL7|G3ATL7\_SPAPN\_430\_667  
 Q0CQ01|Q0CQ01\_ASPTN\_621\_856

649

KKKLESVQKILED AENDLEKMKKFI STEKPKQWKKIWEAE LDKVCEEQQFL  
 PRQLEAVARDISQITQELNKMEEFMKREKPIWTKVWEKELQVCEERDQL  
 PRQLESVSKEISAVTKELKKMQEFLKREKPIWTKIWEKELQVCEERDQL  
 PRQLEAVGRDISAVTKELKKMQDFLKREKPIWTKIWEKELQVCEERDQL  
 PRQLESVSKDISAVTKEIKKMQEFLKREKPVWTKIWEKELQVCEERDQL  
 PRQLETVGKDISAVTKEIKKMQEFLKREKPIWTKIWEKELQVCEERDQL  
 PRQLEAVGRDISAVTKELKKMQDFLKREKPIWTKIWEKELQVCEERDQL  
 KKKLESVQKDLKAQEDLQKMQSYIVTEKPHWKKIWEAE LDKVCEEQQFL  
 RKRLDVVFKQLKSAEDDLSKMQSFIATEKPTWKKSWSE LDKVCEEQQFL  
 PRQLEVTAKDLSVATAELKKLQDMLSKKPIWTKIWEQELQVCEERDQL  
 KKKIENVSSELD SAKKDLQMRNYIDVEKPNWTKIWEAE LDKVCEEQQFM  
 KKKLEAVQQELKQAMKDLKKIEQYINIEKPNWTKIWESE LDKVCEEQQFL  
 PRQLESVSKEISAVTKEVKKMQDFLKREKPVWTKIWEKELQVCEERDQL  
 PRQLEVTAKDLSIATAELKKLQDFLAKEKPLWTKIWEQELQVCEERDML  
 PNQLESVTKDITLTKELKKMEEFMKREKPIWTKIWEKELQVCEERDQL  
 PRQLEEVSRDISIATS D LKKLQEF LKREKPVWTKIWEKELQVCEERDQL  
 KKKLESVQQELLDANNMCKMEEQFIAIEKPHWKKIWEAE LDKVCEEQQFL  
 PRQLEAVGRDISAVTKELKKMQDFLKREKPIWTKIWEKELQVCEERDQL  
 KKKLDVAVLSDLINEAEKELSSMQSFI STEKPGWKKIWESE LDKVCEEQQFL  
 PRQLEGVSRDISMVMKEIKKMQDFLGRKPIWTKIWEKELQVCEERDQL  
 PRQLESVGRDISAVTKEIKKMQEFLKREKPIWTKIWEKELQVCEERDQL  
 PSQLEAVTRDIATLTKELSKMEEYMKQEKPIWTKIWEKELQVCEERDQL  
 PRQLEAVARDIALITKELAKMEEYMKREKPIWTKIWEKELQVCEERDQL  
 PRQLEAVTRDIALITKELSKMEEYMKQEKPIWTKIWEKELQVCEERDQL  
 PRQLEGVAKDITRLTME LKKVEDYMKQEKPIWTKIWEKELQVCEERDQL  
 PRQLETTAKDLSTAI AELKKLQDLLAKEKPLWTKIWEQELQVCEERDML  
 PRQLEDISKEISTAAKQLTKVKEFKREKPIWTRIWEQELQVCEERDML  
 KKKLES LAKDLKKA EVDLNKMQQFIDTEKPKQWKKIWEAE LDKVCEEQQFL  
 PRQLETVAMDITKLSKELKKVEDYMKREKPIWTKIWEKELQVCEERDQL  
 PRQLETVAKEISQITIELKKMEEYMKREKPVWTRIWEKELQVCEERDQL  
 EKQLKHIKDIKSAKDSLHDMSSYISKERP WKKIWESE LDKVCEEQQFL  
 AQQLKATMKEIVAAGDSLKDMSSFINKEKT V WKKIWEAE LDKVCEEQQFF  
 PRQLEVVAKDVTALSKELKAMEDYMAKPKPIWTKIWEKELQVCEERDQL  
 EKQIKNTVKEIENAKSALRSMTDFISKERNWKKIWEAE LDKVCEEQHFF  
 PRQLEMV GKD ISAVTKEVKKMQEFLKREKPIWTKIWEKELQVCEERDQL

Input protein seq

C0NMS1|C0NMS1\_AJECG\_813\_1054  
 C5JIM8|C5JIM8\_AJEDS\_758\_999  
 G8JM94|G8JM94\_ERECY\_505\_740  
 C4JTL0|C4JTL0\_UNCRE\_763\_1005  
 A5DT78|A5DT78\_LODEL\_567\_805  
 C0RYR4|C0RYR4\_PARBP\_747\_990  
 B8LVI6|B8LVI6\_TALSN\_772\_1009  
 B2B176|B2B176\_PODAN\_778\_1024  
 A7EXU2|A7EXU2\_SCLS1\_748\_984  
 C5E095|C5E095\_ZYGR\_627\_861  
 G0VKP2|G0VKP2\_NAUCC\_499\_733  
 G0S222|G0S222\_CHATD\_740\_981  
 B0XQ86|B0XQ86\_ASPFC\_715\_953  
 C5FGY5|C5FGY5\_ARTOC\_704\_937  
 A2QQ46|A2QQ46\_ASPNC\_595\_832  
 Q5BDQ6|Q5BDQ6\_EMENI\_663\_900  
 E4V6G7|E4V6G7\_ARTGP\_772\_1004  
 G8ZTF7|G8ZTF7\_TORDC\_503\_737  
 A7TKA3|A7TKA3\_VANPO\_580\_812  
 E5R4K3|E5R4K3\_LEPMJ\_701\_942  
 Q6CSS1|Q6CSS1\_KLULA\_463\_695  
 Q752S8|Q752S8\_ASHGO\_464\_702  
 A1CQE8|A1CQE8\_ASPCL\_720\_958  
 Q0USK3|Q0USK3\_PHANO\_614\_857  
 F8MP24|F8MP24\_NEUT8\_719\_970

650

692

TLQEEIILD LKED LGKALETFDLIKLCC EEQEKN-PSRSKSNPI-----  
 TMQEDLVIDLEDDLDKATQTFALVEQATKQQSLH--STS NATPG-----P  
 TMQEDLVIDLEDDLEKATQTFGLVEQATKQQSLD--SNSNTPG-----P  
 TLQEDL VFDLQEDLNKANETF DLVRLCC EEQEKN-PNRSRTNPI-----  
 TMQEDLAVDLEDDLEKATQTFALVEQATKQQALH-GADPNGNAP-----V  
 NLQEDLTRDLDQDDLKIKIETF DLVEQCSIEQSR S-VSSKRNKTV-----  
 TMQEDLVIDLEDDLEKATQTFALVEQATKQQSLQTSNNSNTVG-----P  
 TMQEDL AADLEDDLEKAAQTFALVEQATRQQNVQ-APDGG-----  
 RVMEDLIVDLRDDLEKASETFALVEQATKEQMKD-AGSNGGAVE-----GR  
 TMQEDL AADLQDDLKAAQTFALVEQATKEQLKD-GSPSQVGTG-----  
 TLQEDL TADLKD LGKALETFDLVNMCCVEQERH-PKRSRNPPI-----  
 TLQEDLVL D L N E D L A K A A E T F G L I N M C C E E K E K N - P T R P K A N P I -----  
 R M V E E L I I D L R D D L E K A S E T F S L V E Q A T R E Q M K D - A G P N G S -----  
 T M Q E D L A A D L E D D L E K A A Q T F A L V E Q A T K Q Q A L Q H N V N G G -----  
 T M Q E D L A V D L E D D L E K A T Q T F A L V E Q A T K Q Q A L E - N S G S N P N N -----  
 T M Q E D L A A D L Q D D L E K A A Q T F A L V E Q A T K Q Q A M Q - N S S G G -----  
 T M Q E D L A A D L Q D D L E K A A Q T F A L V E Q A T K Q Q A M Q - N G N S G -----  
 T M Q E D L A V D L E D D L E K A T Q T F A L V E Q A T K Q Q A L E - S V G A N P N N -----  
 T L Q E D L A A D L E D D L G K A L E T F D L V S L C C A E Q E K N - P K R S K T A P I -----  
 T L Q E D L T F D L S E D L A K A S E T Y D L V K L C C E E Q E K N - P K K I R N P I -----  
 T M Q E E L A A D L Q D D V E K A A Q T L E L V E Q A T K Q Q H L E - S E K E A G -----  
 T L Q E D L V F D L Q E D L N K V M E T F D L V K L C C E E Q E K A - P K K N K G N P I -----  
 T L Q E D L V F D L Q E D L T K A N E T F D L V K L C C E E Q E K N - P K R T R T N P I -----  
 T M Q E D L A A D L E D D L E K A A Q T F A L V E Q A T K Q Q S L Q Q N A N G G -----  
 T M Q E E L A A D L Q D D L E K A A Q T L E L V E Q A T K Q Q N L E - T E K E Q T G Q -----  
 R L M E D L M I D L R D D L E K A S E T F A L V E Q A T K E Q M K E - G G Q G N T V N G S V S N G P

650

692

F9XNV1|F9XNV1\_MYCGM\_735\_976  
 G0WGY8|G0WGY8\_NAUDC\_529\_761  
 E9CRI9|E9CRI9\_COCPS\_229\_471  
 G8BZF4|G8BZF4\_TETPH\_539\_773  
 B6H938|B6H938\_PENCW\_630\_867  
 B8N7C6|B8N7C6\_ASPFN\_422\_660  
 G2QNC1|G2QNC1\_THIHA\_727\_972  
 G2RG25|G2RG25\_THITE\_710\_954  
 Q2GNJ2|Q2GNJ2\_CHAGB\_640\_887  
 G2XAD1|G2XAD1\_VERDV\_678\_911  
 E3RQ08|E3RQ08\_PYRTT\_696\_940  
 H6BXA5|H6BXA5\_EXODN\_750\_985  
 H2ANZ7|H2ANZ7\_KAZAF\_476\_713  
 E3QGD9|E3QGD9\_COLGM\_636\_870  
 G4MPB7|G4MPB7\_MAGO7\_726\_967  
 C5MCQ6|C5MCQ6\_CANTT\_510\_747  
 G3B1Y0|G3B1Y0\_CANTC\_529\_767  
 G0RS34|G0RS34\_HYPJQ\_714\_954  
 G3ATL7|G3ATL7\_SPAPN\_430\_667  
 Q0CQ01|Q0CQ01\_ASPTN\_621\_856

TMQEEI|LAADLEDDLEKAAQTTFALVEQATKQQLNLA-SPTANGGAV-----P  
 TLQEEI|LVLDLKDLDLKGASSETFTLINLCCSEEQEK-NPTRTKTNPI-----  
 TMQED|LAVDLEDDLEKATQTFALVEQATKQQLALQ-SSNPDGNAT-----V  
 TLQED|LAFDLEDDLEKASSETFELVKLCCSEEQEKY-PKKVRTNPI-----  
 TMQED|LAADLQDDLEKATQTFALVEQATKEQVLT-NATGG-----  
 TMQED|LAADLQDDVEKAAQTTFALVEQATKEQTMQN-NPNSNG-----  
 RLVED|LIVDLRDDLEKASSETFALVEQATKEQMKD-AGPGGVGG-----  
 RLAEED|LIVDLRDDLEKASSETFALVEQATKEQMKD-AGPGGVGG-----  
 RLVED|LIVDLRDDLEKASSETFALVEQATKEQMKD-AGGAGAGPG-----GV  
 RLMED|LMVDLQDDLEKASSETFALVEAATKEQLKD-NGTGASAGN-----  
 TMQEEI|LAADLQDDLEKAAQTLELVEQATKQQLNLE-NEKEASGK-----  
 TQQDEI|LMNDLDGDLIEDITNVFKLVEEATKQQLNQ-AASTGGR-----  
 TLQED|LIMDLNEDLNKAQETYNLIDLCFQEQEK-NPQKVKNPI-----  
 RLMED|LIMDLQDDLEKASSETFALVEQATKEQLKD-NGTTASAGT-----  
 RIMEE|LIVDLQDDLEKASSETFALVEQATKEQLKD-AGAGNAAGP---IGP  
 NLQDD|LIQDLQEDIKKEIETTFGLIEQCSVEQTKG-KSSKRKIV-----  
 NLQDD|LTKDLEEDLAKIQETFDLVEQCSLEQSKQ-SSYRRNKVV-----  
 RIMEE|LLIDLQDDLEKASSETFTLVEQATKEQMKD-SGTGHSAST-----  
 KVQDEI|LTDLEEDIKMEETFTLIEQCSIEQSKG-STRKRKVV-----  
 TMQED|LAADLQDDLEKAAQTTFALVEQATKQQLALQ-NANQG-----

Input protein seq

C0NMS1|C0NMS1\_AJECG\_813\_1054  
 C5JIM8|C5JIM8\_AJEDS\_758\_999  
 G8JM94|G8JM94\_EREYC\_505\_740  
 C4JTL0|C4JTL0\_UNCRE\_763\_1005  
 A5DT78|A5DT78\_LODEL\_567\_805  
 C0RYR4|C0RYR4\_PABBP\_747\_990  
 B8LVI6|B8LVI6\_TALSN\_772\_1009  
 B2B176|B2B176\_PODAN\_778\_1024  
 A7EXU2|A7EXU2\_SCLS1\_748\_984  
 C5E095|C5E095\_ZYGR\_627\_861  
 G0VKP2|G0VKP2\_NAUCC\_499\_733  
 G0S222|G0S222\_CHATD\_740\_981  
 B0XQ86|B0XQ86\_ASPFC\_715\_953  
 C5FGY5|C5FGY5\_ARTOC\_704\_937  
 A2QQ46|A2QQ46\_ASPNC\_595\_832  
 Q5BDQ6|Q5BDQ6\_EMENI\_663\_900  
 E4V6G7|E4V6G7\_ARTGP\_772\_1004  
 G8ZTF7|G8ZTF7\_TORDC\_503\_737  
 A7TKA3|A7TKA3\_VANPO\_580\_812  
 E5R4K3|E5R4K3\_LEPMJ\_701\_942  
 Q6CSS1|Q6CSS1\_KLUGA\_463\_695  
 Q752S8|Q752S8\_ASHO\_464\_702  
 A1CQE8|A1CQE8\_ASPCL\_720\_958  
 Q0USK3|Q0USK3\_PHANO\_614\_857  
 F8MP24|F8MP24\_NEUT8\_719\_970  
 F9XNV1|F9XNV1\_MYCGM\_735\_976  
 G0WGY8|G0WGY8\_NAUDC\_529\_761  
 E9CRI9|E9CRI9\_COCPS\_229\_471  
 G8BZF4|G8BZF4\_TETPH\_539\_773  
 B6H938|B6H938\_PENCW\_630\_867  
 B8N7C6|B8N7C6\_ASPFN\_422\_660  
 G2QNC1|G2QNC1\_THIHA\_727\_972  
 G2RG25|G2RG25\_THITE\_710\_954  
 Q2GNJ2|Q2GNJ2\_CHAGB\_640\_887  
 G2XAD1|G2XAD1\_VERDV\_678\_911  
 E3RQ08|E3RQ08\_PYRTT\_696\_940  
 H6BXA5|H6BXA5\_EXODN\_750\_985  
 H2ANZ7|H2ANZ7\_KAZAF\_476\_713  
 E3QGD9|E3QGD9\_COLGM\_636\_870  
 G4MPB7|G4MPB7\_MAGO7\_726\_967

693

727

-----LPIMRPG-TFNQVREQVMVAVQSLNPDHDSRVEAID  
 NGLRNVS-----RNPVD-EFPDPMKAKDHLLGEVRAALQPNHENRLEAIE  
 HGLRNVS-----RNPID-EPLDPMKAKDYLLGEVRAALQPNHENRLEAIE  
 -----LPLVKPG-TMNELRDRLLSEVQSLNPDHESRVQAIQ  
 PGFRVPS-----RTLPPD-AAIDPVKAKDSVLGEVRAALQPNHENRVEAIE  
 -----ANPIPEPGESLHNIKDQVLDVIQIKPDHESRVEAIE  
 QGFRAVS-----RNIPAN-EFPDPMKAKDHLLGEVRAALPNHKDRLEAIE  
 PVLIRSTS-----RTLAIID-QGVDPVKAKDGVLGEVRAALQPNHESRLEAIE  
 PVLIRQFS--KGLNSINSN-AFVDPDAKEGVLGEVRAALQPNHENRLEAIE  
 ---RSLS-----KINRI-DPIDPAMAKEGVLDEVRAALQPNHENRLEAIE  
 -----LPIPEPG-TFHRVRDQVLNEVQALNPDHNERIEALE  
 -----LPIPKPG-TFHVVRDQMLMAVESINPDHESRLKALD  
 IVPRQGA--FGKPLFSNN-AFIDPASAKEGVLGEVRAALQPDHASRLEAIE  
 VALRNTS-----RNVID-PAVDPKAKDDVLGEVRAALQPNHESRLEAIE  
 VAVRTVS-----RT--MN-PHIDPADAKDSVLGEVRAALQPNHESRLEAIE  
 PTLRNTS-----RNVID-PAVDPKAKDSVLGEVRAALQPNHESRLEAIE  
 PTLRNTS-----RNVID-PAVDPKAKDSVLGEVRAALQPNHESRLEAIE  
 IAVRNVS-----RT--HN-PNIDPADAKDSVLGEVRAALQPNHESRLEAIE  
 -----LPIPKPG-TLNVVRDQLLVEVQSLNPDHESRVEALE  
 -----LPIPKPG-TMNQVRDQLLVEVQSLNPNHEGRVDALE  
 KGTRTASGRNMINAASFD-KAVDPRQARDGVLGEVKALQPNHESRLEAIE  
 -----LPIAKPG-TYNMIRDQVLTEVQNLNPDHDSRVEAIK  
 -----LPLTKPG-TLTDLRDMVLMVEVQNLNPDHESRVQAIQ  
 VPLRNTS-----RNVGS-PAIDPMKAKDGVLGEVRAALQPNHESRLEAIE  
 KGLRSASGRNAINAALD-KVVDPREARDGVLGEVKALQPNHESRLEAIE  
 TPFGAFS--RGLKSTSEKVTHADPSEAKEGVLGEVRAALQPNHQSRLEAIE  
 TGVRSTS-----RTLVPPI-PTADPAKAKDSVLGEVRAALQPNHESRLEAIE  
 -----LPIPKPG-TFTEVRNQLLVDVLSITPDHESRLEAIG  
 VSFVRS-----RTLPLD-PSIDPVKAKDSVLGEVRAALQPNHENRVEAIE  
 -----LPIPKPG-TLNQTRDQLLVDVQSLVDPHESRVDALQ  
 TAVRAPS-----RTIGID-PTIDPMKAKDGVLGEVRAALQPNHESRLEAIE  
 VTLRNTS-----RNVID-PAVDPKAKDSVLGEVRAALQPNHESRLEAIE  
 IAARQFS--KGLNSTRENAALADPSAAKEGVLGEVRAALQPNHENRLEAIE  
 ITARQFS--KGLNSTRDN-ALVDPATAAKEGVLGEVRAALQPNHENRLEAIE  
 IVARQFS--KGLNSTRENAALADPNTAKEGVLGEVRAALQPNHENRLEAIE  
 --ARNFS--KGLNSLIG--NSVDPNAAKEGVLGEVRAALMPNHEDRLEAIE  
 GGMRSASGRNMLNAVAD-KVVDPRQARDGVLGEVKALQPNHEGRLEAIE  
 -----QGLKQLPFD-TDVPHEAKSGMLDEVRAALQPNHESRLEAIE  
 -----LPIPKPG-TFGQVREQVMLAVQSLNPNYDSRIDALE  
 --ARNFS--KGLNNSLIG--NSSDPNAAKDGVLGEVRAALQPNHENRLEAIE  
 GVLIRQFS--RGLNLSLIG--AFVDPNAAKEGVLGEVRAALQPNHENRLEAIE

693

727

```
C5MCQ6|C5MCQ6_CANTT_510_747  - - - - - ANLYIPEPGE SLHTAKDAV LNDIAALTPNHESRVEAIE
G3B1Y0|G3B1Y0_CANTC_529_767  - - - - - ANLPIPEPGENLHSIKDAV LSEVAALKPDHESRVDAIN
G0RS34|G0RS34_HYPJQ_714_954  - - VRTFS - - KGLNNIG - - NSLDQNAAKEDMLGEVRAALQPNHQDRLEAIE
G3ATL7|G3ATL7_SPAPN_430_667  - - - - - ANLYIPEPGE SLHDIKDAV LNEVVALVDPHQSRVEAIE
Q0CQ01|Q0CQ01_ASPTN_621_856  VTLRNVS - - - - - RN - - ID - PSVDPLKAKDNV LGEVRAALQPDHESRLEAIE
```

728

776

```
Input protein seq
C0NMS1|C0NMS1_AJECG_813_1054  KAEKMWEMERKLRKASNEFDDELENFVGNLSNKKKSGGFEEVERIRKQKDE
C5JIM8|C5JIM8_AJEDS_758_999  RAEKARREKELESRRIGPLQKELGKFVEEGKLLKKS-GGFEEIERMRKAKDE
G8JM94|G8JM94_ERECY_505_740  RAEKLRREKELQYKDGNAFELLEDFVGSAGFKRA-GGIEEVERLRKERDE
C4JTL0|C4JTL0_UNCRE_763_1005  RAEKARQKELENRRVGFQKELGAFVQOGKLLKKS-GGFEEAERLRKAKDE
A5DT78|A5DT78_LODEL_567_805  RAEKLRQRERELARNDDKQFQELGDFVEDGKLLKKS-GGIEEIEENMRKQRDQ
C0RYR4|C0RYR4_PARBP_747_990  RAEKARQKELKTRRVGGLQKELGKFVEEGKLLKKS-GGFEEVERMRKAKDE
B8LVI6|B8LVI6_TALSN_772_1009  RAEKARQKELESRRVGLFQKELGQFVEEGKLLKKS-GGFEEETERLRRAKDE
B2B176|B2B176_PODAN_778_1024  RAEKLRQKELETRRMQNLPLKKELETNFVEEGRLKKS-GGVEEVERARAKAKE
A7EXU2|A7EXU2_SCLS1_748_984  RAEKLRQKELEGRGNVLLQKELTQFVEEGKLLKKS-GGFEEEVERQRIAKDA
C5E095|C5E095_ZYGR_627_861  RAQKMWEREREYRD TDAFEDELGNFVEKGNLKTAGGVEEVERIRKQKDE
G0VKP2|G0VKP2_NAUCC_499_733  KAQRLWQKEKEFKDGD EFEDELGNFVGNLSNKKSGGVEEVERLRQRDE
G0S222|G0S222_CHATD_740_981  RAEKARQKELEERRMENPLKKEELISFVEEGRLLKKS-GGVEEVERARAKAD
B0XQ86|B0XQ86_ASFPC_715_953  RAEKARQKELENRRIGL FQKELGAFVQEGKLLKKS-GGVEEAERQRRVKDD
C5FGY5|C5FGY5_ARTOC_704_937  RAEKARQRELESRRGGEFQRELSNFVAGGKLLKSNGGFEEELERVKEKEE
A2QQ46|A2QQ46_ASPNC_595_832  RAEKARQKELETRRIGL FQKELGAFVEEGKLLKKS-GGVEEAERLRRAKDD
Q5BDQ6|Q5BDQ6_EMENI_663_900  RAEKARQKELETRRV DLFQKELGTFVQEGKLLKKS-GGFEEAERLRRAKDE
E4V6G7|E4V6G7_ARTGP_772_1004  RAEKARQRELESRRGGEFQKELSSFVGANKLKNTGGFEELERVKEKEE
G8ZTF7|G8ZTF7_TORDC_503_737  RAEKLRWLKEREYRDNGE FEEELGHFVEKSSFKRS-GGVEEVERLRQRKDE
A7TKA3|A7TKA3_VANPO_580_812  KAQKLRQIEREYRD TDFEDELGSFVEKSNFKKS-GGIEEIERLRREKDE
E5R4K3|E5R4K3_LEPMJ_701_942  RAEKARQRELETRND DFEKRELG SFVEEGKLLKKS-GGVEEVERMRKAKDE
Q6CSS1|Q6CSS1_KLULA_463_695  KAEKLRNREKEYKNEA FEFDELGNFVEKGNFKKAGGIEEIERLRKQKDE
Q752S8|Q752S8_ASHGO_464_702  RAEKLRREKELQYKDS SVFESELVNFVGNNGFKRA-GGIEEVERIRRAKDE
A1CQE8|A1CQE8_ASPL_720_958  RAEKARQKELETRRIGL FQKELGAFVEEGKLLKKS-GGVEEAERQRRVKDD
Q0USK3|Q0USK3_PHANO_614_857  RAEKARQRELA TRND DFEKRELG N FVEEGKLLKKS-GGVEEVERLRKAKDE
F8MP24|F8MP24_NEUT8_719_970  RAEKLRQKELEQTRM VNP LTKELAS FVEEGKLLKKS-GGVEEVERARAKAD
F9XNV1|F9XNV1_MYCGM_735_976  RAERLRQRELETRR EGEFQKELGNFVEEGKLLKKS-GGVEEVERQRKSRED
G0WGY8|G0WGY8_NAUDC_529_761  KAEKLRQKEREYRAG D EFDDELGD FVEKSA LKKS-GGVEEVERLRQKNR
E9CRI9|E9CRI9_COCPS_229_471  RAEKARQKELESRRIG QFQKELGAFVEEGKLLKKS-GGFEEAERLRKAKDE
G8BZF4|G8BZF4_TETPH_539_773  KAQKIWQKEIRLKN D E FQELGTFVGNASF KKTGGIEEIERLRQKNE
B6H938|B6H938_PENCW_630_867  RAEKARKKELETRRIGL FQKELGAFVEEGKLLKKS-GGFEEETERLRTAKDD
B8N7C6|B8N7C6_ASPFN_422_660  RAEKARQKELENRRIGL FQKELGAFVEEGKLLKKS-GGVEETERLRRAKDD
G2QNC1|G2QNC1_THIHA_727_972  RAEKLRQKELERRREN PLTKELAS FVEEGKLLKKS-GGVEEVERARAKAD
G2RG25|G2RG25_THITE_710_954  RAEKLRQKELERRREN PLKQELVS FVEEGKLLKKS-GGVEEVERARAKAD
Q2GNJ2|Q2GNJ2_CHAGB_640_887  RAEKLRQKELARRREN PLTKELAT FVEEGKLLKKS-GGVEEVERARAKAD
E2XAD1|E2XAD1_VERDV_678_911  RAEKLRQRELA TRNT NKLQREL TNFVEEGRLLKKS-GGFEEVERARAKAD
G3RQ08|E3RQ08_PYRTT_696_940  RAEKARQRDL ETRND EFKRELGTFVEEGKLLKKS-GGVEEAERLRKAKDE
H6BXA5|H6BXA5_EXODN_750_985  RAAKVRQRELESRRVGE FQREVEK FVEEGKLLKKT-GGMDVEVERRRKLKDE
H2ANZ7|H2ANZ7_KAZAF_476_713  KAEKLRWEKEKQYKED TAFRDELGRFVESSSLKKS-GGVEEIEKVRKQKDE
E3QGD9|E3QGD9_COLGM_636_870  RAEKLRQKELEGRKGN ELQRELS SFVEEGKLLKKS-GGFEEVERARAKAD
G4MPB7|G4MPB7_MAGO7_726_967  RAEKLRQKELETRKGN ALTK EITAFVGEKLLKKS-GGFEEVERARAKAMD
C5MCQ6|C5MCQ6_CANTT_510_747  RAEKIREREKEMMR LNK FQEEELGD FVEDNRLKKS-GGIEELEKARQIKDS
G3B1Y0|G3B1Y0_CANTC_529_767  KAEKLRQKNKQMM DLT E FQEEELGS FIDDSKLLKKS-GGIDEIERQRQLKDS
G0RS34|G0RS34_HYPJQ_714_954  RAEKLRQKELKTRT NPLHREMKA FVSEKLLKKS-GGFEEVERARLAKDE
G3ATL7|G3ATL7_SPAPN_430_667  RAEKLREREKEMMK LNQ FQEEELGD FVEDKLLKKS-GGIAEVEKMRSQKDS
Q0CQ01|Q0CQ01_ASPTN_621_856  RAEKARQKELENRRIGL FQKELGS FVQEGKLLKKS-GGVEETERLRRAKDD
```

777

788

```
Input protein seq
C0NMS1|C0NMS1_AJECG_813_1054  A N L R A Y F G P G F T
C5JIM8|C5JIM8_AJEDS_758_999  R I R K E V W - - - - -
G8JM94|G8JM94_ERECY_505_740  Q N L R Q N F G - - - G
C4JTL0|C4JTL0_UNCRE_763_1005  K I R K E A W - - - - -
A5DT78|A5DT78_LODEL_567_805  E N L K S S F G - - - I
```

7 7 7

7 8 8

|                              |   |   |   |   |   |   |   |   |   |   |   |
|------------------------------|---|---|---|---|---|---|---|---|---|---|---|
| C0RYR4 C0RYR4_PARBP_747_990  | R | I | R | K | E | V | W | - | - | - | - |
| B8LVI6 B8LVI6_TALSN_772_1009 | R | I | R | K | E | V | W | - | - | - | - |
| B2B176 B2B176_PODAN_778_1024 | R | I | R | R | E | V | W | - | - | - | - |
| A7EXU2 A7EXU2_SCLS1_748_984  | R | I | R | R | E | V | W | - | - | - | - |
| C5E095 C5E095_ZYGRC_627_861  | N | N | L | R | A | Y | F | G | - | - | G |
| G0VKP2 G0VKP2_NAUCC_499_733  | E | N | L | R | A | N | F | G | - | - | G |
| G0S222 G0S222_CHATD_740_981  | Q | I | R | R | Q | V | W | - | - | - | - |
| B0XQ86 B0XQ86_ASPFC_715_953  | R | I | R | K | E | V | W | - | - | - | - |
| C5FGY5 C5FGY5_ARTOC_704_937  | S | I | R | K | E | V | W | - | - | - | - |
| A2QQ46 A2QQ46_ASPNC_595_832  | R | I | R | K | E | V | W | - | - | - | - |
| Q5BDQ6 Q5BDQ6_EMENI_663_900  | R | N | R | K | E | M | W | - | - | - | - |
| E4V6G7 E4V6G7_ARTGP_772_1004 | S | I | R | R | E | V | W | - | - | - | - |
| G8ZTF7 G8ZTF7_TORDC_503_737  | E | N | L | R | A | N | F | G | - | - | G |
| A7TKA3 A7TKA3_VANPO_580_812  | E | N | L | R | T | T | F | G | - | - | - |
| E5R4K3 E5R4K3_LEPMJ_701_942  | R | A | R | K | E | N | - | - | - | - | - |
| Q6CSS1 Q6CSS1_KLULA_463_695  | E | N | L | R | V | N | F | G | - | - | - |
| Q752S8 Q752S8_ASHGO_464_702  | E | N | L | R | S | N | F | G | L | G | A |
| A1CQE8 A1CQE8_ASPCL_720_958  | R | I | R | K | E | V | W | - | - | - | - |
| Q0USK3 Q0USK3_PHANO_614_857  | R | A | R | K | E | N | - | - | - | - | - |
| F8MP24 F8MP24_NEUT8_719_970  | R | I | R | R | E | V | W | - | - | - | - |
| F9XNV1 F9XNV1_MYCGM_735_976  | R | T | R | K | E | I | W | - | - | - | - |
| G0WGY8 G0WGY8_NAUDC_529_761  | E | N | L | R | A | N | F | - | - | - | - |
| E9CRI9 E9CRI9_COCPS_229_471  | K | I | R | K | E | V | W | - | - | - | - |
| G8BZF4 G8BZF4_TETPH_539_773  | E | N | L | R | A | G | L | G | - | - | I |
| B6H938 B6H938_PENCW_630_867  | R | I | R | K | E | V | W | - | - | - | - |
| B8N7C6 B8N7C6_ASPFN_422_660  | R | I | R | R | E | V | W | - | - | - | - |
| G2QNC1 G2QNC1_THIHA_727_972  | R | I | R | R | E | V | W | - | - | - | - |
| G2RG25 G2RG25_THITE_710_954  | R | I | R | R | E | V | W | - | - | - | - |
| Q2GNJ2 Q2GNJ2_CHAGB_640_887  | R | I | R | R | E | V | W | - | - | - | - |
| G2XAD1 G2XAD1_VERDV_678_911  | R | I | R | R | E | V | W | - | - | - | - |
| E3RQ08 E3RQ08_PYRRT_696_940  | R | A | R | K | E | N | F | - | - | - | - |
| H6BXA5 H6BXA5_EXODN_750_985  | A | A | R | K | E | N | W | - | - | - | - |
| H2ANZ7 H2ANZ7_KAZAF_476_713  | E | N | L | R | A | V | F | G | T | N | I |
| E3QGD9 E3QGD9_COLGM_636_870  | M | I | R | K | Q | V | W | - | - | - | - |
| G4MPB7 G4MPB7_MAGO7_726_967  | K | I | R | R | E | V | W | - | - | - | - |
| C5MCQ6 C5MCQ6_CANTT_510_747  | E | N | L | K | S | S | F | G | - | - | I |
| G3B1Y0 G3B1Y0_CANTC_529_767  | E | N | L | K | S | S | M | G | - | - | G |
| G0RS34 G0RS34_HYPJQ_714_954  | K | I | R | R | E | V | W | - | - | - | - |
| G3ATL7 G3ATL7_SPAPN_430_667  | E | N | L | K | S | S | F | G | - | - | I |
| Q0CQ01 Q0CQ01_ASPTN_621_856  | R | I | R | K | E | V | W | - | - | - | - |

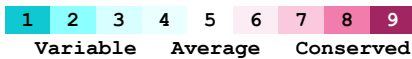

**X** - Insufficient data - the calculation for this site was performed on less than 10% of the sequences.

>Input\_protein\_seq

AKNSSNRMYMEKSQTTELGDLSDTLLSKVDDLQDVIEIMRKDVAERRSQPAKKKLETVSKDLENAQADVLLKQEFIDTEKPHWKKTWAEELDKVCEEQQFL  
TLQEEELILDLDKEDLGKALETFDLIKLCCCEEQEKNPSSRSKSNPILPIMRPGTFNQVREQVMVAVQSLNPNHDHRSRVEAIDKAEKMWEMERKLLKASNEFDDEL  
ENFVGNLSNLKKSQGGFEEVERIRKQKDEANLFRAYFGPGFT

> [CONMS1](#) | CONMS1\_AJECG\_813\_1054 | SubName: Full=Bud site selection protein; - Ajellomyces  
capsulata (strain G186AR / H82 / ATCC MYA-2454 / RMSCC 2432) (Darling's disease fungus)  
(Histoplasma capsulatum)

EGDAGRARVNAVAGKELADESERIVARVDDLQDLVEDLRKDVVTRGVRPLPRQLEAVGRDISAVTKELKMKQEFKREKPIWTKIWEKELQLVCEEERDQLT  
MQEDLVIDLEDDLEKATQTFALVEQATKQQLSHSTSNATPGPNGLRNVSRNFPVDEPFDPMPKAKDHLLEGEVRALQPNHENRLEAIERAEKAREKELESRR  
IGFLQKELGKFVEEGKLLKKSQGGFEEIERMRKAKDERIRKEVW

> [C5JIM8](#) | C5JIM8\_AJEDS\_758\_999 | SubName: Full=Actin-interacting protein; - Ajellomyces  
dermatitidis (strain SLH14081) (Blastomyces dermatitidis)

EGDAGRARVNAVAGKELADESERIVARVDDLQDLVEDLRKDVVTRGVRPLPRQLEAVGRDISAVTKELKMKQEFKREKPIWTKIWEKELQLVCEEERDQLT  
MQEDLVIDLEDDLEKATQTFGLVEQATKQQLSDNSNTTPGPHGLRNVSRNFPIDEPLDPMKAKDYLLGEVRALQPNHENRLEAIERAEKARQKELETRR  
VGFLQKELGKFVEEGKLLKKSQGGFEEIERMRKAKEDRIRKEVW

> [G8JM94](#) | G8JM94\_ERECY\_505\_740 | SubName: Full=Putative uncharacterized protein; - Eremothecium  
cymbalariae (strain CBS 270.75 / DBVPG 7215 / KCTC 17166 / NRRL Y-17582) (Yeast)

ASTSSNRVYMEQSQTKLSELSDILLAKVDDLQDIIIEGLRDKVAIRGAKPTRKRLDAVQNELKRATEDLGKMEAYINIEKPNWKMIVESELDKVCEEQQFL  
TLQEDLVFDLQEDLNKANETFDLVRLLCCCEEQEKPNPNSRTPNIPILPLVPGTMMELNRDRLLSEVQSLNPDHESRVAIQRAEKLREKELQYKDGNAFELEL  
EDFVGSAGFAKRGAGGIEEVERLRKERDEQNLRQNFQGG

> [C4JTL0](#) | C4JTL0\_UNCRE\_763\_1005 | SubName: Full=Putative uncharacterized protein; - Uncinocarpus  
reesii (strain UAMH 1704)

EGDAGRARINAGKELADESEKLVARVDDLQDLVEDLRKDVVTRGVRPLPRQLEAVGRDISAVTKELKMKQDFLRREKPIWTKIWEKELQVCEEERDQLT  
MQEDLVIDLEDDLEKATQTFALVEQATKQQLALHGADPNGNAPVPGFRVPSRTLPDAAIDPVKAKDSVLGEVRALQPNHENRVEAIERAEKARQKELENR  
RVGKQKELGAFVQGGKLLKKSQGGFEEAERLRKAKDEKIRKEAW

> [A5DT78](#) | A5DT78\_LODEL\_567\_805 | SubName: Full=Putative uncharacterized protein; - Lodderomyces  
elongisporus (strain ATCC 11503 / CBS 2605 / JCM 1781 / NBRC 1676 / NRRL YB-4239) (Yeast)

(Saccharomyces elongisporus)  
SSQSSNRLYMESQSKLSDSDKLLTKVDDLQDLMEVVRKDAVQRGVRVGEKQKLYIVKEIQDANKTLQQMSTYITSEKSTWKKIWESELDKVCEEQQFF  
NLQEDLTRDLQDDLLKQIETFDLVEQCSIEQSRVSSSKRNVVANIPPEPGESLHNIKQDVLVDIIQLKPDHESRVEAIERAEKLRQRERELARNDKQF  
EELGDFVEDGKLLKKSQGGIEEIEENMRKQRDQENLKSQFQI

> [C0RYR4](#) | C0RYR4\_PARBP\_747\_990 | SubName: Full=Bud site selection protein; - Paracoccidioides  
brasilensis (strain Pb03)

EGDAGRARVNAVAGKELADESEKIVARVDDLQDLVEDLRKDVVTRGVRPLPRQLEAVGRDISAVTKELKMKQEFKREKPIWTKIWEKELQLVCEEERDQLT  
MQEDLVIDLEDDLEKATQTFALVEQATKQQLSQTNSNSNSTTGPQGFRAVSRNIPANEPFDPMPKAKDHLLEGEVRALLPNHKDRLEAIERAEKARQKELKT  
RRVGPQKELGKFVEEGKLLKKSQGGFEEVERMRKAKDERIRKEVW

> [B8LVI6](#) | B8LVI6\_TALSN\_772\_1009 | SubName: Full=Actin-interacting protein (Bud6/Aip3), putative; -  
Talaromyces stipitatus (strain ATCC 10500 / CBS 375.48 / QM 6759 / NRRL 1006) (Penicillium  
stipitatum)

EGDAGRARINSGKELSDSERLVGRVDDLQDLVEDLRKDVVSRGVRPLPRQLEAVSKDSTVTKVEKMKQDFLREKPIWTKIWEKELQLVCEEERDQLT  
MQEDLAADLEDDLEKAAQTFALVEQATRQNVQAPDGGPVLRSRSTRLAIDQGVDPVAKDGVLGEVRALQPNHESRLEAIERAEKARQKELESRRVGLF  
QKELGQFVEEGKLLKKSQGGFEETERLRRAKDERIRKEVW

> [B2B176](#) | B2B176\_PODAN\_778\_1024 | SubName: Full=Predicted CDS Pa\_3\_9560; - Podospora anserina  
(strain S / ATCC MYA-4624 / DSM 980 / FGSC 10383) (Pleurage anserina)

EGDSGRAYVINGRQKLNQDSDRLVNVKVDLQDLVEDLRKDVVHRGVRPLPRQLESVTKDITQLTKELNKMEEYMKQEKPVWTKIWEKELEDVQCQRDEL  
VMEDLVIDLRDLEKASETFALVEQATKEQMKDAGSNGGAVEGRPVLRQFSKGLNSINSNAFVDPRAKEGVLGEVRALQPNHENRLEAIERAEKLRQKE  
LETRMQLNPLKELTNFVEEGRLLKKSQGGVEEVERARAKAEEIRREVW

> [A7EXU2](#) | A7EXU2\_SCLS1\_748\_984 | SubName: Full=Putative uncharacterized protein; - Sclerotinia  
sclerotiorum (strain ATCC 18683 / 1980 / Ss-1) (White mold) (Whetzelinia sclerotiorum)

GDSGRSYVNGGKKNLSESDKLVAVDDLQDVIDELRDKDVVQRGVRPLPKQLETVAKDISQATMELKRMQDFLKRERPIWTKIWEKELETVCNDREIEITM  
QEDLAADLQDDLEKAAQTFALVEQATKEQLKDGSPSQVGTGRSLSKLNRIDPIDPAMAKEGVLDEVRALQPNHENRLEAIERAEKLRQKELEGRGNVQL  
KELTQFVEEGKLLKKSQGGFEEVERQRIAKDARIRREVW

> [C5E095](#) | C5E095\_ZYGR\_627\_861 | SubName: Full=ZYRO0G10868p; - Zygosaccharomyces rouxii (strain  
ATCC 2623 / CBS 732 / NBRC 1130 / NCYC 568 / NRRL Y-229) (Candida mogii)

KSSSNRYIETSQNLSELSALLSKVDDLQDVIEVLRKDVAVHGVKPSKLLDSVQKELVLAENDLSMMQFMQNEKPKQWKKIWKAELEKVCCEEQQFLT  
IQEDLTADLKEDLGKALETFDLVNMCCVEQERHPKRSRNPILPIPEPGTFHRVVRDQVINEVQALNPDHNERIEALERAQKMWEREREYRDTDAFEDEL  
NFVEKGNLKTAGVVEEVERIRKQKDENNLFRAYFGG

> [G0VKP2](#) | G0VKP2\_NAUCC\_499\_733 | SubName: Full=Uncharacterized protein; - Naumovozyma castelli  
(strain ATCC 76901 / CBS 4309 / NBRC 1992 / NRRL Y-12630) (Yeast) (Saccharomyces castelli)

KTSANKVYMEKSQAEELGEVSDSLLSRVDDLQDLIEVLRKDVADRGAEPSSKLLDSVQKILEDAENDLEKMKKFIKTEKPKQWKKIWEAELDKVCEEQQFLT  
IQEDLVIDLNLAKAAETFGLINMCCCEEKKNPTRPKANPILPILKPGTFHQVRDQMLMAVESINPDHESRLKALDKAQLRWQKEKFKDGEFEDEL  
NFVGNLSNLKKSQGGVEEVERLRRQRDEENLRANFGG

> [G0S222](#) | G0S222\_CHATD\_740\_981 | SubName: Full=Putative uncharacterized protein; - Chaetomium  
thermophilum (strain DSM 1495 / CBS 144.50 / IMI 039719)

EGDSGRAYVMNGRKRNLNADSDRLVNVKVDLQDAVEDLRKDVVHRGVRPLPRQLEAVARDISQLTQELNKMEEFMKREKPIWTKVWEKELEDVQCQRDEL  
MVEELIDLRDLEKASETFSLVEQATREQMKDAGPNSIVPRQAFGKPLFSNNAFIDPASAKEGVLGEVRALQPDHASRLEAIERAEKARQKELERRM  
ENPLKELISFVEEGRLLKKSQGGVEEVERARAKDDQIRRQVW

> [B0XQ86](#) | B0XQ86\_ASPFC\_715\_953 | SubName: Full=Actin-interacting protein (Bud6/Aip3), putative; -

Neosartorya fumigata (strain CEA10 / CBS 144.89 / FGSC A1163) (Aspergillus fumigatus)  
EGDAGRARVNAGKKELADESERLVGRVDDLDLQDLVEDLRKDVVSRGVRPLPRQLESVSKEISAVTKELKMKQEFLLKREKPIWTKIWEKELQLVCEERDQLT  
MQEDLAADLEDDLEKAAQTALVEQATKQQALQHNVNGGVALRNTSRNVVIDPAVDPMAKAKDDVLGEVRAIQPNHESRLEAIERAEKARQKELENRRIGL  
FQKELGAFVQEGKLLKSGVVEEAERQRRVKDDIRKEVW  
> [C5FGY5](#) | C5FGY5\_ARTOC\_704\_937 | SubName: Full=Y1BUD6; - Arthroderma otae (strain ATCC MYA-4605 / CBS 113480) (Microsporium canis)  
ARVQAGKKELADESEKLVARVDDLDLQDLVEDLRKDVVTRGVRLPRQLEAVGRDISAVTKELKMKQDFLLKREKPIWTKIWEKELQLVCEERDQLTMQEDLA  
VDLEDDLEKATQTFALVEQATKQQALENSGSPNNVAVRTVSRMTMNPIDPADAKDSVLGEVRAIQPNHESRLEAIERAEKARQRELESRRGGEFQRELS  
NFVGGAGKLLKSGGFEELERVRKEKEESIRKEVW  
> [A2Q046](#) | A2Q046\_ASPNC\_595\_832 | SubName: Full=Putative uncharacterized protein An08g01240; Flags:  
Precursor; - Aspergillus niger (strain CBS 513.88 / FGSC A1513)  
EGDAGRVRVNSGKKELADESERLVARVDDLDLQDLVEDLRKDVVTRGVRLPRQLESVSKEISAVTKELKMKQEFLLKREKPIWTKIWEKELQLVCEERDQLT  
MQEDLAADLQDDLEKAAQTALVEQATKQQAMQNSGGPTLRNTSRNVVIDPAVDPMAKAKDSVLGEVRAIQPNHESRLEAIERAEKARQKELETRRIGLF  
QKELGAFVVEEGKLLKSGVVEEAERLRRAKDDIRKEVW  
> [Q5BDQ6](#) | Q5BDQ6\_EMENI\_663\_900 | SubName: Full=Polarisome component BudA (Eurofung); - Emericella  
nidulans (strain FGSC A4 / ATCC 38163 / CBS 112.46 / NRRL 194 / M139) (Aspergillus nidulans)  
EGDAGRVRVNLGKKELADESERLVARVDDLDLQDLVEDLRKDVVTRGVRLPRQLETVGKDISAVTKELKMKQEFLLKREKPIWTKIWEKELQLVCEERDQLT  
MQEDLAADLQDDLEKAAQTALVEQATKQQAMQNSGGPTLRNTSRNVVIDPAVDPMAKAKDSVLGEVRAIQPNHESRLEAIERAEKARQKELETRRVDLF  
QKELGTFVQEGKLLKSGGFEEAERLRRAKDERNRKEMW  
> [E4V6G7](#) | E4V6G7\_ARTGP\_772\_1004 | SubName: Full=Bud site selection protein 6; - Arthroderma  
gypseum (strain ATCC MYA-4604 / CBS 118893) (Microsporium gypseum)  
ARVQAGKKELADESEKLVARVDDLDLQDLVEDLRKDVVTRGVRLPRQLEAVGRDISAVTKELKMKQDFLLKREKPIWTKIWEKELQLVCEERDQLTMQEDLA  
VDLEDDLEKATQTFALVEQATKQQALENSGANPNNAIVRNVSRTHNPIDPADAKDSVLGEVRAIQPNHESRLEAIERAEKARQRELESRRGGEFQKELS  
SFVGGANKLNTGGFEELERVRKEKEESIRREVW  
> [G8ZTF7](#) | G8ZTF7\_TORDC\_503\_737 | SubName: Full=Putative uncharacterized protein TDEL0D03170; -  
Torulaspora delbrueckii (strain ATCC 10662 / CBS 1146 / NBRC 0425 / NCYC 2629 / NRRL Y-866) (Yeast)  
(Candida colliculosa)  
AASSNRAYMDKSQSLGEEESDALLSRVDDLDLQDLIEILRKDVAAARGAKPSKKKLESVQKDLKAAQEDLQKMKQYIVTEKPHWKKIWEAELDKVCEEQQFLT  
LQEDLAADLDEDLGALETDFDLVSLCCAEQEKPNKRKSTAPILPPIKPGTLLNVVRDQLLVEVQSLNPDHESRVEALERAELKWLKEREYRDNGEFEEELG  
HFVEKSSFKRSGGVEEVERLRRQKDEENLRANFGG  
> [A7TKA3](#) | A7TKA3\_VANPO\_580\_812 | SubName: Full=Putative uncharacterized protein; - Vanderwaltozyma  
polyspora (strain ATCC 22028 / DSM 70294) (Kluyveromyces polysporus)  
NSSDRSYMEKSQTKLGDIDSLLTRVDDLDQDVIEVLRKDVADRGVVKPTRKRLDVFVKQLKSAEDDLKMQSFIATEKPTWKKSWSELDKVCCEEQQFLT  
QEDLTFDLSEDLAKASETYDLVLCCEEQEKPNKIRNPNILPPIKPGTMNQVRDQLLVEVQSLNPNHEGRVDALEKAQKLWQIEREYRDTDFEDELGS  
FVEKSNFKKSGGIEIEIERLRREKDEENLRRTTFG  
> [E5R4K3](#) | E5R4K3\_LEPMJ\_701\_942 | SubName: Full=Putative uncharacterized protein; - Leptosphaeria  
maculans (strain JN3 / isolate v23.1.3 / race Av1-4-5-6-7-8) (Blackleg fungus) (Phoma lingam)  
GDSGRAYINAGKKTLEQDESEKIVNRVDDLDLQDLIEDLRKDVVTRGVRLPRQLEVTAKDLSVATAELKLLQDMSKEKPIWTKIWEQELQTVCEERDQLT  
QEBLAADLQDDVEKAAQTALVEQATKQQHLESEKEAGKGRTRASGRNMINAASFDKAVDPRQARDGVLGEVKALQPNHESRLEAIERAEKARQRELETR  
NDDEFKRELGSFVEEGKLLKSGGVEEVERMRKAKDERARKEN  
> [Q6CSS1](#) | Q6CSS1\_KLULA\_463\_695 | SubName: Full=KLLA0C18359p; - Kluyveromyces lactis (strain ATCC  
8585 / CBS 2359 / DSM 70799 / NBRC 1267 / NRRL Y-1140 / WM37) (Yeast) (Candida sphaerica)  
KSANRDYMEKSQSKLSEVSDNLLSKVDDLDQDVIEALRKDVAIRGARTPKKKIENVSSELDKAKDLDQMRNYIDVEKPNWTKIWEAELDRVCEEQQFMTL  
QEDLVFDLQEDLNKVMETFDLVKLCCEEQEKAPKKNKGNPILPIAKPGTYNMIRDQVLTEVQNLNPDHDSRVEAIKKAELRNREKEYKENEAFEDELGN  
FVEKGNFKKAGGIEIEIERLRKQKDEENLRVNFG  
> [Q752S8](#) | Q752S8\_ASHGO\_464\_702 | SubName: Full=AFR495Cp; - Ashbya gossypii (strain ATCC 10895 /  
CBS 109.51 / FGSC 9923 / NRRL Y-1056) (Yeast) (Eremothecium gossypii)  
ASTSANRVYMEQSHSKLSELSDSLAKVDDLDQDIIEALRKDVAIRGAKPTKKKLEAVQQLKQAMKDLKKIEQYINIEKPNWTKIWESELDKVCCEEQQFL  
TLQEDLVFDLQEDLTKANETFDLVKLCCEEQEKPNKRTTRNPNILPLTKPGTLLDRDMVLMVEVQNLNPDHESRVQAIERAELREKELQYKDSVFESEL  
VNFVGNNGFKRAGGIEEVERIRRARDEENLRNFGGLAS  
> [A1CQE8](#) | A1CQE8\_ASPCL\_720\_958 | SubName: Full=Actin-interacting protein (Bud6/Aip3), putative; -  
Aspergillus clavatus (strain ATCC 1007 / CBS 513.65 / DSM 816 / NCTC 3887 / NRRL 1)  
EGDAGRVRVNSGKKELADESERLVGRVDDLDLQDLVEDLRKDVVSRGVRPLPRQLESVSKEISAVTKEVKMKQDFLLKREKPIWTKIWEKELQLVCEERDQLT  
MQEDLAADLEDDLEKAAQTALVEQATKQQSLQONANGVPLRNTSRNVGSGPAIDPMAKAKDGLGEVRAIQPNHESRLEAIERAEKARQRELENRRIGL  
FQKELGAFVVEEGKLLKSGVVEEAERQRRVKDDIRKEVW  
> [Q0USK3](#) | Q0USK3\_PHANO\_614\_857 | SubName: Full=Putative uncharacterized protein; - Phaeosphaeria  
nodorum (strain SN15 / ATCC MYA-4574 / FGSC 10173) (Glume blotch fungus) (Septoria nodorum)  
GDTGRAYINTGKSLQDDSEKIVNRVDDLDLQDLVEDLRKDVVTRGVRLPRQLEVTAKDLSIATAELKLLQDFLAKEKPLWTKIWEQELQTVCEERDQLT  
QEBLAADLQDDLEKAAQTALVEQATKQQNLETEKEQTGQKGLRSASGRNAINAAALDKVVDPREARDGVLGEVKALQPNHESRLEAIERAEKARQRELA  
TRNDDEFKRELGNFVEEGKLLKSGGVEEVERLRKAKDERARKEN  
> [F8MP24](#) | F8MP24\_NEUT8\_719\_970 | SubName: Full=Putative uncharacterized protein; - Neurospora  
tetrasperma (strain FGSC 2508 / ATCC MYA-4615 / P0657)  
EGDSGRAYVTKGRKLLNADSDWLVNKVDDLDLQDLIEDLRKDVVTRGVRLPRQLESVTKDITTLTKELKMKMEEFMKKEKPIWTKIWEKELEEVQGRDEL  
LMEDLMIDLRRDLEKASETFALVEQATKEQMKEGGQNTVNGSVSNGPTPFAGFSRGLKSISEKVTHADPSEAKEGVLGEVRAIQPNHQRLEAIERAEK  
LRQKELQTRMVNPLTKELASFVEEGKLLKSGGVEEVERARKAKDDIRREVW  
> [F9XNV1](#) | F9XNV1\_MYCGM\_735\_976 | SubName: Full=Putative uncharacterized protein; - Mycosphaerella  
graminicola (strain CBS 115943 / IPO323) (Speckled leaf blotch fungus) (Septoria tritici)  
NNTGRAYVNNGKLSDDSESIVNRVDDLDLQDLVEDLRKDVVTRGVRLPRQLEEVSRDISIATSDLKLQEFLLRKEKPIWTKIWEKELQVVCDDRDLLTM



QEELAADLEDDLEKAAQTFALVEQATKQQNLASPTANGGAVPTGVRSTRTLVPIPTADPAKAKDSVLGEVRALQPNHESRLEAIERAERLRQRELETRR  
EGEFQKELGNFVEEGKLLKSGGVEEVERQRKSRREDRTRKEIW

> [G0WGY8](#) | G0WGY8\_NAUDC\_529\_761 | SubName: Full=Uncharacterized protein; - Naumovozyma dairenensis  
(strain ATCC 10597 / BCRC 20456 / CBS 421 / NBRC 0211 / NRRL Y-12639) (Saccharomyces dairenensis)  
KTSANRVYMDKSNELGEVSDSLLSRVDDLDIIEVIRKDVADRGAKPSKKKLESVQQEELLDANNMCKMEQFIAIEKPHWKKIWE TELDKVCEEQQFLT  
LQEBELVLDLKDLEDGKASETFALVEQATKQQALQSSNPDGNATVVSFRVASRTLPDPSIDPVKAKDSVLGEVRALQPNHENRVEAIERAEKARQKELESR  
RIGQFQKELGAFVEEGKLLKSGGFEAAERLRKAKDEKIRKEVW

> [E9CRI9](#) | E9CRI9\_COCPS\_229\_471 | SubName: Full=Actin interacting protein; - Coccidioides posadasii  
(strain RMSCC 757 / Silveira) (Valley fever fungus)  
EGDAGRARVNAGKELADESEKLVARVDDLDLVEDLRKDVVTRGVRLPRQLEAVGRDISAVTKELKKMQDFLKREKPIWTKIWEKELQQVCEERDQLT  
MQEDLAVDLEDDLEKATQTFALVEQATKQQALQSSNPDGNATVVSFRVASRTLPDPSIDPVKAKDSVLGEVRALQPNHENRVEAIERAEKARQKELESR  
RIGQFQKELGAFVEEGKLLKSGGFEAAERLRKAKDEKIRKEVW

> [G8BZF4](#) | G8BZF4\_TETPH\_539\_773 | SubName: Full=Putative uncharacterized protein TPHA0K01490; -  
Tetrapisispora phaffii (strain ATCC 24235 / CBS 4417 / NBRC 1672 / NRRL Y-8282 / UCD 70-5) (Yeast)  
(Fabospora phaffii)  
AGSSTRSYIEKSKLGVSDNLLSKVDDIQDIIEVLRKDVAVRGVNPSSKKLDAVLSDLNEAEKELSSMQSFISTEKPGWKRIWESELDKVCEEQQFLT  
LQEDLAFDLVEDLKKASETFALVEQATKQQALQSSNPDGNATVVSFRVASRTLPDPSIDPVKAKDSVLGEVRALQPNHENRVEAIERAEKARQKELESR  
TFVGNASFKKTTGGIEIERIRQQKNEENLRAGLGI

> [B6H938](#) | B6H938\_PENCW\_630\_867 | SubName: Full=Pc16g03380 protein; - Penicillium chrysogenum  
(strain ATCC 28089 / DSM 1075 / Wisconsin 54-1255) (Penicillium notatum)  
EGDAGRARVNTGKELAAESERLVARVDDLDLVEDLRKDVVTRGVRLPRQLEGVSRDISMVMKEIKKMDFLGRKPIWTKIWEKELQLVCEERDQLT  
MQEDLAAQLDQDDLEKATQTFALVEQATKQQALQSSNPDGNATVVSFRVASRTLPDPSIDPVKAKDSVLGEVRALQPNHESRLEAIERAEKARQKELESR  
RIGQFQKELGAFVEEGKLLKSGGFEAAERLRKAKDEKIRKEVW

> [B8N7C6](#) | B8N7C6\_ASPFN\_422\_660 | SubName: Full=Actin-interacting protein (Bud6/Aip3), putative; -  
Aspergillus flavus (strain ATCC 200026 / FGSC A1120 / NRRL 3357 / JCM 12722 / SRRC 167)  
EGDAGRARVNSGKELGEESERLVARVDDLDLVEDLRKDVVTRGVRLPRQLESVKGDISAVTKEIKKMDFLGRKPIWTKIWEKELQLVCEERDQLT  
MQEDLAAQLDQDDLEKATQTFALVEQATKQQALQSSNPDGNATVVSFRVASRTLPDPSIDPVKAKDSVLGEVRALQPNHESRLEAIERAEKARQKELESR  
RIGQFQKELGAFVEEGKLLKSGGFEAAERLRKAKDEKIRKEVW

> [G2QNC1](#) | G2QNC1\_THIHA\_727\_972 | SubName: Full=Putative uncharacterized protein; - Thielavia  
heterothallica (strain ATCC 42464 / BCRC 31852 / DSM 1799) (Myceliophthora thermophila)  
EGESGHSYVANGRKKLNADSDRLVNKVVDDLDQDMVEDLRKDVVHVRGVRPLPSQLEAVTRDIATLTKELSKMEEYMKQEKPIWTKIWEKELEDVQCGRDEL  
LVEDLIVDLRDDLLEKASETFALVEQATKQQALQSSNPDGNATVVSFRVASRTLPDPSIDPVKAKDSVLGEVRALQPNHENRLEAIERAEKARQKELESR  
ERRRENPLTKELASFVEEGKLLKSGGVEEVERARAKKDERIRREVW

> [G2RG25](#) | G2RG25\_THITE\_710\_954 | SubName: Full=Putative uncharacterized protein; - Thielavia  
terrestris (strain ATCC 38088 / NRRL 8126) (Acremonium alabamense)  
EGDAGHSYVIKGRKQLNADSDRLVNKVVDDLDQDMVEDLRKDVVHVRGVRPLPSQLEAVTRDIATLTKELSKMEEYMKQEKPIWTKIWEKELEDVQCGRDEL  
LVEDLIVDLRDDLLEKASETFALVEQATKQQALQSSNPDGNATVVSFRVASRTLPDPSIDPVKAKDSVLGEVRALQPNHENRLEAIERAEKARQKELESR  
RRRENPLKQELVSFVEEGKLLKSGGVEEVERARAKKDDIRREVW

> [Q2GNJ2](#) | Q2GNJ2\_CHAGB\_640\_887 | SubName: Full=Putative uncharacterized protein; - Chaetomium  
globosum (strain ATCC 6205 / CBS 148.51 / DSM 1962 / NBRC 6347 / NRRL 1970) (Soil fungus)  
EGNAGHAYVITGRKQLNADSDRLVNKVVDDLDQDMVEDLRKDVVHVRGVRPLPSQLEAVTRDIATLTKELSKMEEYMKQEKPIWTKIWEKELEDVQCGRDEL  
LVEDLIVDLRDDLLEKASETFALVEQATKQQALQSSNPDGNATVVSFRVASRTLPDPSIDPVKAKDSVLGEVRALQPNHENRLEAIERAEKARQKELESR  
ELARRRENPLTKELATFVEEGKLLKSGGVEEVERARAKKDDIRREVW

> [G2XAD1](#) | G2XAD1\_VERDV\_678\_911 | SubName: Full=Bud site selection protein; - Verticillium dahliae  
(strain VdLs.17 / ATCC MYA-4575 / FGSC 10137)  
YVSKGREQLNQSDRLVTKVDDLDQDMVEDLRKDVVHVRGVRPLPSQLEAVTRDIATLTKELSKMEEYMKQEKPIWTKIWEKELEDVCKGRDELRLMEDLMV  
DLQDDLEKASETFALVEQATKQQALQSSNPDGNATVVSFRVASRTLPDPSIDPVKAKDSVLGEVRALQPNHENRLEAIERAEKARQKELESR  
TNFVEEGRLKSGGFEAAERLRKAKDEKIRKEVW

> [E3RQ08](#) | E3RQ08\_PYRTT\_696\_940 | SubName: Full=Putative uncharacterized protein; - Pyrenophora  
teres f. teres (strain 0-1) (Barley net blotch fungus) (Drechslera teres f. teres)  
QDSGRAYINTGKALQDDSEKIVNRVDDLDLVEDLRKDVVLRGVRPLPRQLETTAKDLSTAIKELKLLQDLLEKELPLWTKIWEQELQTVCEERDMLTM  
QEELAADLQDDLEKAAQTFALVEQATKQQALQSSNPDGNATVVSFRVASRTLPDPSIDPVKAKDSVLGEVRALQPNHENRLEAIERAEKARQKELESR  
TRNDDEFKRELGTFFVEEGKLLKSGGVEAAERLRKAKDERARKEVW

> [H6BXA5](#) | H6BXA5\_EXODN\_750\_985 | SubName: Full=Putative uncharacterized protein; - Exophiala  
dermatitidis (strain ATCC 34100 / CBS 525.76 / NIH/UT8656) (Black yeast) (Wangiella dermatitidis)  
KGDAGRAHINESKKVLSDDSEALVNRVDDLSDIVEELRKDVVTRGVRLPRQLEDISKEIATAKQLTKVKEFVKREKPIWTRIWEQELQVVMTERDEL  
TQDELMNDLDGDDLEDITNVFKLVEEATKQQALQSSNPDGNATVVSFRVASRTLPDPSIDPVKAKDSVLGEVRALQPNHENRLEAIERAEKARQKELESR  
EVEKFVEEGKLLKSGGFEAAERLRKAKDEKIRKEVW

> [H2ANZ7](#) | H2ANZ7\_KAZAF\_476\_713 | SubName: Full=Putative uncharacterized protein KAFR0A06620; -  
Kazachstania africana (strain ATCC 22294 / BCRC 22015 / CBS 2517 / CECT 1963 / NBRC 1671 / NRRL  
Y-8276) (Yeast) (Kluyveromyces africanus)  
SATGSAKAYMEKSSQSELGQVSDGLLSRVDDLDIIEILRDKVAERGARPSKKKLESLSLAKDLKKAEDVLDNMQQFIDTEKPKQWKRIWEAELDKVCEEQQFL  
TLQEDLIMDLNEDLNKAQETYNLIDLFCFQEQEKNPQKVVNPILPILPKPGTFQGVREQVMLAVQSINPNYDSRIDALEKAELKWEKEKQYKEDTAFRDEL  
GRFVSESSLLKSGGVEEIEKVRKQKDEENLRVAVFGTNI

> [E3QGD9](#) | E3QGD9\_COLGM\_636\_870 | SubName: Full=Actin interacting protein 3; - Colletotrichum  
graminicola (strain M1.001 / M2 / FGSC 10212) (Maize anthracnose fungus) (Glomerella graminicola)  
AYVHKGREQLNADSDRLVAKVDDLDLVEDLRKDVVHVRGVRPLPRQLETVAMDITKLSKELKKVEDYMKKEKPIWTKIWEKELEDVCKGRDELRLMEDLM  
IDLQDDLEKASETFALVEQATKQQALQSSNPDGNATVVSFRVASRTLPDPSIDPVKAKDSVLGEVRALQPNHENRLEAIERAEKARQKELESR

LSSFVVEEGKLLKSGGFEEVERARKAKDDMIRKQVW  
> [G4MPB7](#) | G4MPB7\_MAG07\_726\_967 | SubName: Full=Bud site selection protein 6; - Magnaporthe oryzae (strain 70-15 / ATCC MYA-4617 / FGSC 8958) (Rice blast fungus) (Pyricularia oryzae)  
AYVIKGRKQLNTDSDRLVTQVDDLQDIVEDLRKDVVTRGVRPRPRQLETVAKEISQLTIELKKMEEYMKREKPVWTRIWEKELEEVCGREELRIMEELM  
IDLQDDLEKASETFFALVEQATKEQLKDAGAGNAAGPIGPGVLRQFSRGLNIGNNAFVDPSSAAKEGVLGEVRALQPNHENRLEAIERAEKLRQKELETRK  
GNALTKEITAFVGEGLKLLKSGGFEEVERARKAMDDKIRREVW  
> [C5MCQ6](#) | C5MCQ6\_CANTT\_510\_747 | SubName: Full=Putative uncharacterized protein; - Candida tropicalis (strain ATCC MYA-3404 / T1) (Yeast)  
SQNSNRAYMESCNLSDDSLITKVDDLQDVMEEMRKDVQQRGVRVSEKQLKHIIKDIKSAKDSLHDMSSYISKERPVVWKKIWESELDKVCCEEQFLN  
LQDDLIQDLQEDIKKIEETFGLIEQCSVEQTKGKSSKRKNKIVANLYIPEPGESLHTAKDAVLNDIAALTPNHESRVEAIERAEKIREKEREMMRNLKQFE  
ELGDFVEDNRLKSGGIEELEKARQIKDSENKSSFGI  
> [G3B1Y0](#) | G3B1Y0\_CANTC\_529\_767 | SubName: Full=Putative uncharacterized protein; - Candida tenuis (strain ATCC 10573 / BCRC 21748 / CBS 615 / JCM 9827 / NBRC 10315 / NRRL Y-1498 / VKM Y-70) (Yeast)  
ATKSSNRIYMEKCHGRLEESDSSLTKVDDLQDVMEGLRKDVQQRGVRVGAQQKATMKEIVAAGDSLKDMSSFINKEKTWVKKIWEAEELDRVCEEQQFF  
NLQDDLTkdLEEDLAKIQETFdLVEQCSLEQSKQSSYRRNKVVANLPIPEPGENLHSIKDAVLSEVAALPKPDHESRVDAINKAEKLRQKNQMMDLTFEQ  
EELGSFIDDSKLRKSGGIDEIERQRQLKDSENKSSMGG  
> [G0RS34](#) | G0RS34\_HYPJQ\_714\_954 | SubName: Full=Predicted protein; Flags: Fragment; - Hypocrea jecorina (strain QM6a) (Trichoderma reesei)  
EGDAGYAYVSNGRKQLNADSDRLVAKVDDLQDLVEDLRKDVVHRGVRPLPRQLEVVAKDVTALSKEKAMEDYMAKEKPIWTKIWEKELEDVCGRDEL  
IMEELLIDLRDDEKASETFTLVEQATKEQMKDSGTGHSASTVTRTFSGKLNLSLDQNAAKEDMLGEVRALQPNHQDRLEAIERAEKLRQKELKTRTT  
NPLHREMKAFAVSEGLKLLKSGGFEEVERARLAKDEKIRREVW  
> [G3ATL7](#) | G3ATL7\_SPAPN\_430\_667 | SubName: Full=Putative uncharacterized protein; - Spathaspora passalidarum (strain NRRL Y-27907 / 11-Y1)  
SKDSNRSMETCHTKLSEESDVLITKVDDLQDLVEELRKDVQQRGVRVSEKQIKNTVKEIENAKSALRSMTDFISKERNVWKKIWETELDKVCEEQHFFK  
VQDELTIDLEEDIKMEETFTLIEQCSIEQSKGSTKRKNKVVANLYIPEPGENLHDIKDAVLNEVVALVPDQSRVEAIERAEKLREREMMKLNQFQE  
ELGDFVEDKLLKSGGIAEVEKMRSQKDSENKSSFGI  
> [Q0CQ01](#) | Q0CQ01\_ASPTN\_621\_856 | SubName: Full=Putative uncharacterized protein; - Aspergillus terreus (strain NIH 2624 / FGSC A1156)  
EGDAGRARVNSGKKELAEESEIRIVRVDLQDLVEDLRKDVVTRGVRPLPRQLEMVGKDISAVTKEVKKMQEFLKREKPIWTKIWEKELQLVCEERDQLT  
MQEDLAADLQDDLEKAAQTFALVEQATKQALQANQGVTLRNVSRNIDPSVDPLKAKDNVLGEVRALQPDHESRLEAIERAEKARQKELNRRIGLQFK  
ELGSFVQEGKLLKSGGVEETERLRRAKDDIRKEVW
